# Supplementary material for: Amorphous CoSx decorated Cd0.5Zn0.5S with a bulk-twinned homojunction for efficient photocatalytic hydrogen evolution
Source: Royal Society of Chemistry journal article supplement (doi:10.1039/d2cy00174h), 2022-01-01
Supplement: d2cy00174h1.pdf [file d2cy00174h1.pdf]

## Supporting Information

Jingzhuo Tian<sup>a</sup>, Wenhua Xue<sup>a</sup>, Meixin Li<sup>a</sup>, Tao Sun<sup>a</sup>, Xiaoyun Hu<sup>b</sup>, Jun Fan<sup>a</sup>, Enzhou Liu<sup>a\*</sup>

<sup>a</sup>School of Chemical Engineering/Xi'an Key Laboratory of Special Energy Materials, Northwest University,  
Xi'an 710069, P. R. China

<sup>b</sup>School of Physics, Northwest University, Xi'an, 710069, P. R. China

\*e-mail address: liuenzhou@nwu.edu.cn

### Materials

Zinc acetate dihydrate ( $\text{Zn}(\text{CH}_3\text{COO})_2 \cdot 2\text{H}_2\text{O}$ , AR), cadmium acetate dihydrate ( $\text{Cd}(\text{CH}_3\text{COO})_2 \cdot 2\text{H}_2\text{O}$ , AR) and sodium hydroxide (NaOH) were supplied by Shanghai Aladdin Biochemical Technology Co. Ltd. Thioacetamide (TAA), cobalt acetate tetrahydrate ( $\text{Co}(\text{CH}_3\text{COO})_2 \cdot 4\text{H}_2\text{O}$ , AR) were purchased from Tianjin Kemiou Chemical Reagent Co. Ltd. TEOA was purchased from Tianjin Best Chemical Co. Ltd. All reagents were used as received without additional purification. Throughout the entire preparation process, deionized water (18.25 M) was used.

### Physic characterization

The structural and morphological characteristics of the prepared samples were determined by X-ray diffraction pattern (Rigaku, XRD), scanning electron microscopy (JEOLJSM-6390 system) and transmission electron microscopy (TecnaiG2F20S-TWIN). X-ray photoelectron spectroscopy (XPS) was performed by Kratos (AXIS NOVA) to elucidate the chemical state and elemental composition of the catalyst. The light absorption properties of the samples were measured using a UV-Vis spectrophotometer (Shimadzu UV-3600) using  $\text{BaSO}_4$  as a reference. The photoluminescence spectra were obtained using an F-7000 Fluorescence Spectrophotometer with a wavelength of 325 nm. Brunner-Emmet-Teller (BET Quantachrome NOVA 2000e,  $\text{N}_2$  adsorption and desorption isotherms) was used to measure the specific surface area of the samples. Electron paramagnetic resonance (EPR) spectra were obtained on an ELEXSYS-II E500 electron paramagnetic resonance spectrometer.

## Photocatalytic H<sub>2</sub> evolution test

The photocatalytic water splitting experiments for hydrogen production were carried out by an online detection system (Lab Solar III-AG, Beijing Perfect Light Technology Co., Ltd., China) and gas chromatography (TechcoMp, GC7900). Under constant stirring, 10 mg of the catalyst was dispersed into 100 mL of an aqueous solution containing 20 vol% TEOA in a 250 mL heat-resistant flask reactor. Using circulating water to maintain a constant temperature of 30 °C. A 300 W Xe lamp was used as the light source, 15 cm from the liquid level. The system was vacuumed before irradiation. The amount of H<sub>2</sub> was tested by GC7900 gas chromatography using N<sub>2</sub> as the carrier gas.

## Test of Photoelectrochemical Performance

3.0 mg of catalyst was dispersed in a centrifuge tube containing 9 mL of deionized water and then sonicated for 30 min to form a homogeneous suspension. 1mL solution was moved to the FTO glass, then naturally dried to obtain the FTO working electrode.

The photoelectrochemical (PEC) performance of the samples was measured by an electrochemical workstation (Shanghai Chenhua) with a bias potential of 0.5 V, and all measurements were performed in a neutral electrolyte solution (0.5 M Na<sub>2</sub>SO<sub>4</sub>, pH = 7.0). The Hg/HgCl<sub>2</sub> electrode was used as the reference electrode, the Pt wire was used as the counter electrode, and the sample was the working electrode. Transient photocurrent density plots (i-t), linear sweep voltammetry plots (LSV), electrochemical impedance spectroscopy (EIS) and Mott-Schottky (M-S) plots were obtained.<sup>1,2</sup>

The reversible hydrogen electrode (RHE) potential is calculated according to the Nernst equation:<sup>3</sup>

$$E_{\text{RHE}} = E_{\text{Hg/HgCl}_2} + 0.059 \times \text{pH} + E^{\circ}_{\text{Hg/HgCl}_2}$$

Where  $E_{\text{RHE}}$  was the calculated potential vs. RHE,  $E_{\text{Hg/HgCl}_2}$  was the applied electrode potential against the Hg/HgCl<sub>2</sub>,  $E^{\circ}_{\text{Hg/HgCl}_2}$  referred to the standard potential

of Hg/HgCl<sub>2</sub> (the value was 0.24 V), and the pH of 0.5 M Na<sub>2</sub>SO<sub>4</sub> solution was 7.0.

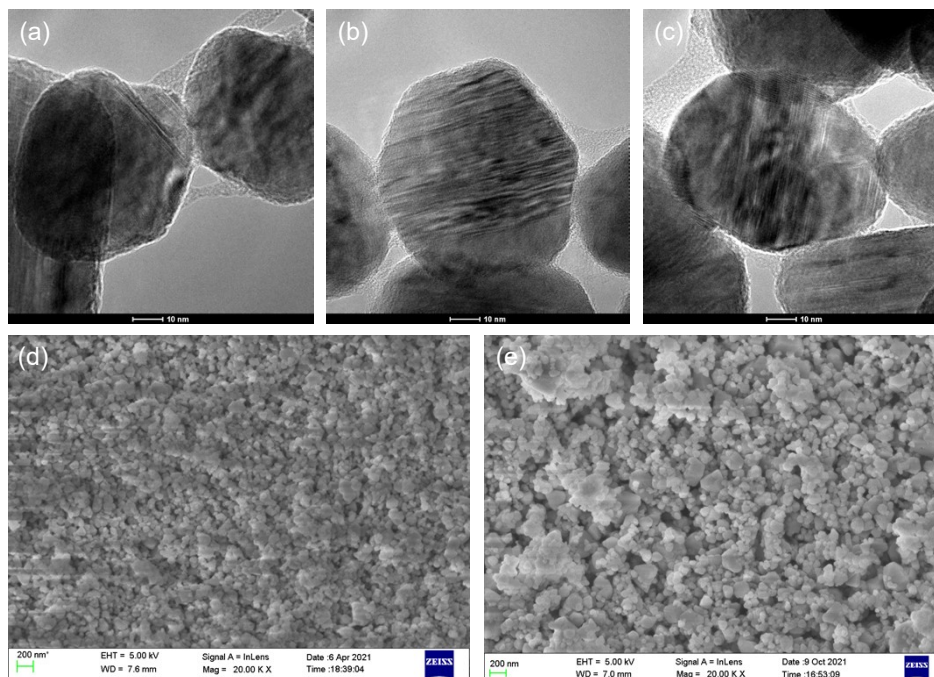

**Fig. S1** (a-c) TEM images of T-CZS, SEM images of (d) T-CZS, (e) CoS<sub>x</sub>.

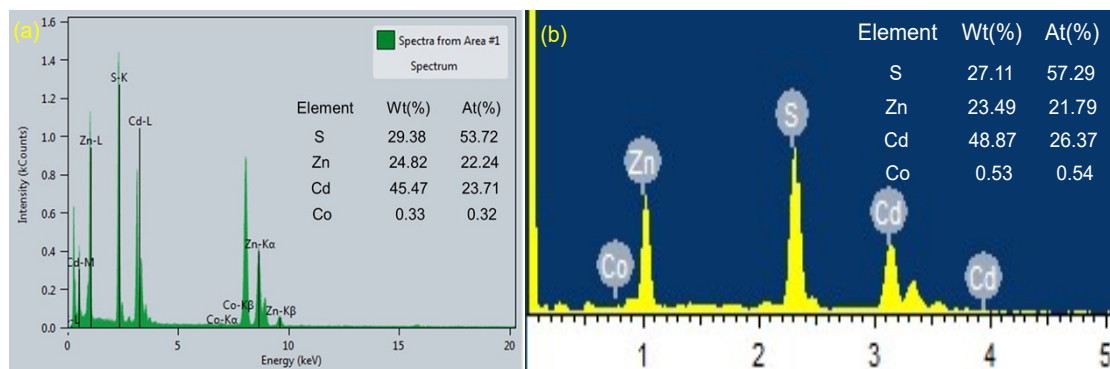

**Fig. S2** (a) EDX and (b) EDS spectrum of 4 wt% CoS<sub>x</sub>/T-CZS.

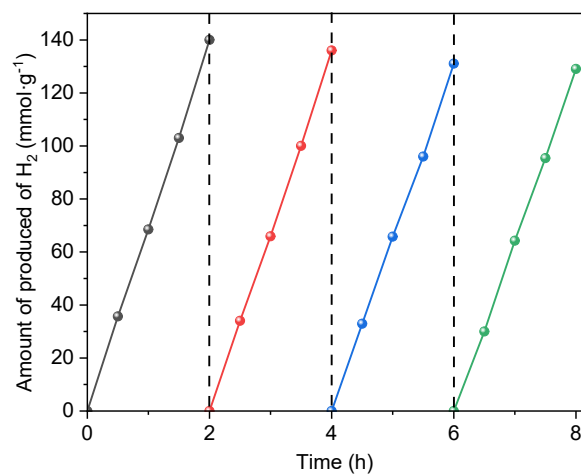

**Fig. S3** Cycling measure of 4 wt% CoS<sub>x</sub>/T-CZS.

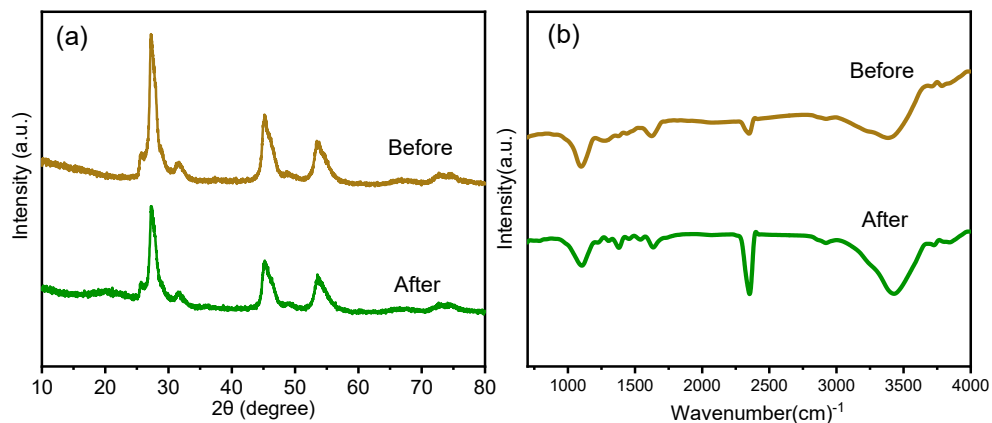

**Fig. S4** (a) XRD, (b) FTIR of 4 wt%  $\text{CoS}_x/\text{T-CZS}$  composite before and after use.

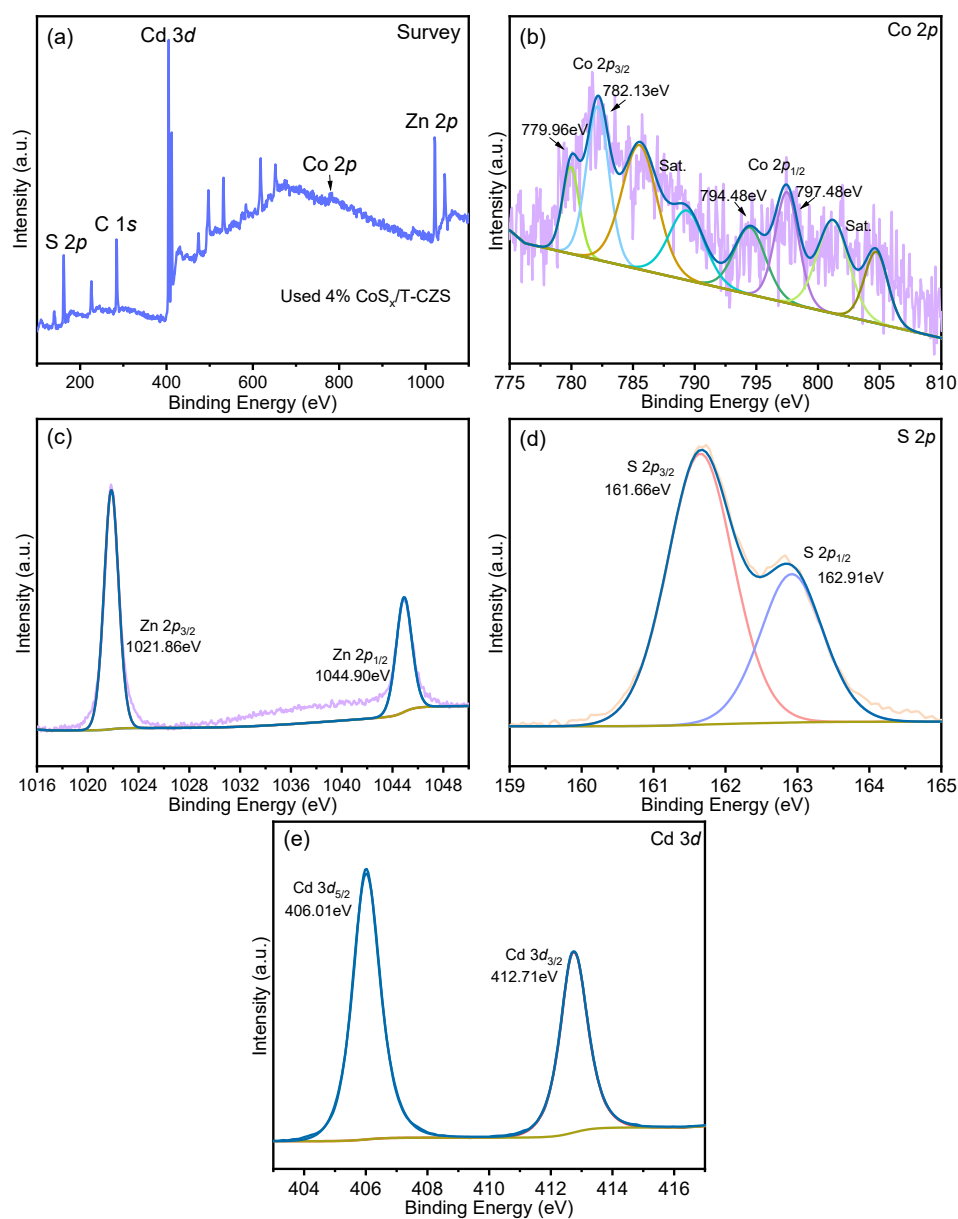

**Fig. S5** The XPS survey spectra of (a) survey spectra, (b) Co 2p, (c) Zn 2p, (d) S 2p, (e) Cd 3d for used

4 wt% CoS<sub>x</sub>/T-CZS composite.

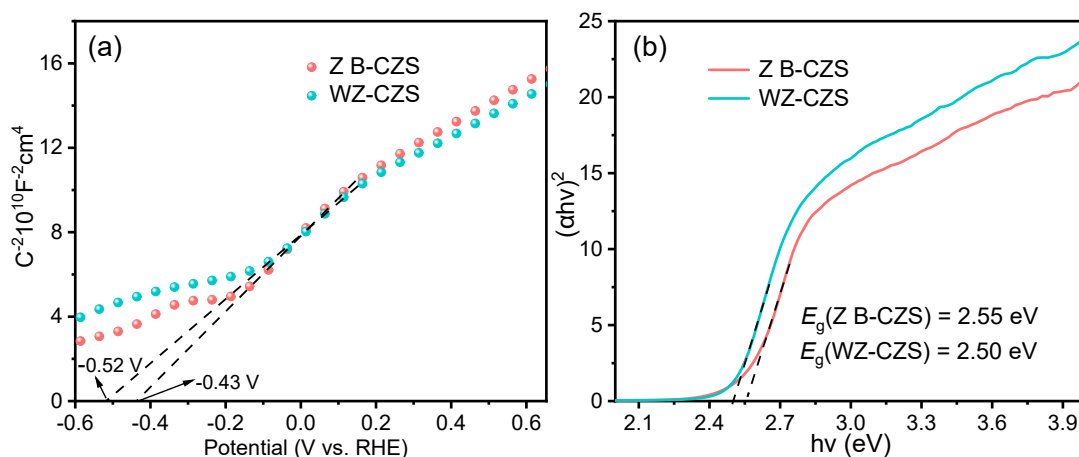

**Fig. S6** (a) Mott-Schottky curve and (b) Kubelka-Munk plots of ZB-CZS and WZ-CZS.

**Table. S1** Related reports of Cd<sub>x</sub>Zn<sub>1-x</sub>S Schottky junction photocatalysts in the literature

| Photocatalyst                                                           | Sacrificial reagents                                                     | Light source                | HER<br>μmol·g <sup>-1</sup> ·h <sup>-1</sup> | Reference |
|-------------------------------------------------------------------------|--------------------------------------------------------------------------|-----------------------------|----------------------------------------------|-----------|
| NiS/Cd <sub>0.4</sub> Zn <sub>0.6</sub> S                               | Na <sub>2</sub> S (0.1 M) +<br>Na <sub>2</sub> SO <sub>3</sub> (0.1 M)   | 300 W Xe lamp<br>λ > 400 nm | 1200 μmol·g <sup>-1</sup> ·h <sup>-1</sup>   | 1         |
| Ni <sub>12</sub> P <sub>5</sub> /Cd <sub>0.5</sub> Zn <sub>0.5</sub> S  | TEOA                                                                     | 300 W Xe lamp<br>λ > 400 nm | 46820 μmol·g <sup>-1</sup> ·h <sup>-1</sup>  | 2         |
| NiCo <sub>2</sub> S <sub>4</sub> /Cd <sub>0.5</sub> Zn <sub>0.5</sub> S | water                                                                    | 300 W Xe lamp               | 2436 μmol·g <sup>-1</sup> ·h <sup>-1</sup>   | 3         |
| Ni <sub>2</sub> P/T-Cd <sub>0.9</sub> Zn <sub>0.1</sub> S               | Na <sub>2</sub> S + Na <sub>2</sub> SO <sub>3</sub>                      | 300 W Xe lamp               | 1800 μmol·g <sup>-1</sup> ·h <sup>-1</sup>   | 4         |
| Ni(OH) <sub>2</sub> /T-Zn <sub>0.5</sub> Cd <sub>0.5</sub> S            | TEOA                                                                     | 300 W Xe lamp<br>λ > 400 nm | 14000 μmol·g <sup>-1</sup> ·h <sup>-1</sup>  | 5         |
| Ni <sub>2</sub> P/Cd <sub>0.5</sub> Zn <sub>0.5</sub> S                 | Na <sub>2</sub> S + Na <sub>2</sub> SO <sub>3</sub>                      | 300 W Xe lamp<br>λ > 400 nm | 65.6 μmol·h <sup>-1</sup>                    | 6         |
| Co <sub>2</sub> P/Cd <sub>0.5</sub> Zn <sub>0.5</sub> S                 | lactic acid                                                              | 300 W Xe lamp<br>λ > 400 nm | 68020 μmol·h <sup>-1</sup>                   | 7         |
| Ni <sub>2</sub> S/Cd <sub>0.5</sub> Zn <sub>0.5</sub> S                 | Na <sub>2</sub> S (0.35 M) +<br>Na <sub>2</sub> SO <sub>3</sub> (0.25 M) | 300 W Xe lamp<br>λ > 400 nm | 1400 μmol·h <sup>-1</sup>                    | 8         |
| Cu/Ni/Cd <sub>0.5</sub> Zn <sub>0.5</sub> S                             | Na <sub>2</sub> S (0.3 M) +<br>Na <sub>2</sub> SO <sub>3</sub> (0.3 M)   | 300 W Xe lamp<br>λ > 400 nm | 58330 μmol·h <sup>-1</sup>                   | 9         |
| CoS <sub>x</sub> /T-Cd <sub>0.5</sub> Zn <sub>0.5</sub> S               | TEOA                                                                     | 300 W Xe lamp               | 76200 μmol·h <sup>-1</sup>                   | This work |

## Reference

- 1 X.-L. Yin, L.-L. Li, J.-H. Jiang, X.-X. Du, D.-H. Pang, J. Yang, Z.-J. Li, Y.-X. Wang, X.-Y. Li, D.-C. Li and J.-M. Dou, *Chem. Eng. J.*, 2019, **375**, 121970.
- 2 W. Xue, W. Chang, X. Hu, J. Fan and E. Liu, *Chin. J. Catal.*, 2021, **42**, 152-163.
- 3 J. Zhao, Y. Cheng, Y. Chen, W. Zhang, E. Liu, J. Fan, H. Miao and X. Hu, *Appl. Surf. Sci.*, 2021, **568**, 150917.

- 4 J. Wang, B. Li, J. Chen, N. Li, J. Zheng, J. Zhao and Z. Zhu, *Appl. Surf. Sci.*, 2012, **259**, 118-123.
- 5 H. Sun, W. Xue, J. Fan, E. Liu and Q. Yu, *J. Alloys Compd.*, 2021, **854**, 156951.
- 6 Z. Shao, X. Meng, H. Lai, D. Zhang, X. Pu, C. Su, H. li, X. Ren and Y. Geng, *Chin. J. Catal.*, 2021, **42**, 439-449.
- 7 B. Debnath, S. Dhingra, V. Sharma, V. Krishnan and C. Nagaraja, *Appl. Surf. Sci.*, 2021, **550**, 149367.
- 8 S. Peng, Y. Yang, J. Tan, C. Gan and Y. Li, *Appl. Surf. Sci.*, 2018, **447**, 822-828.
- 9 Z. Liang and X. Dong, *J. Photochem. Photobiol., A*, 2021, **427**, 113081.
- 10 N. Li, B. Zhou, P. Guo, J. Zhou and D. Jing, *Int. J. Hydrogen Energy.*, 2013, **38**, 11268-11277.
- 11 Ya. Hao, S.-Z. Kang, X. Liu, X. Li, L. Qin and J. Mu, *ACS Sustainable Chem. Eng.*, 2017, **5**, 1165-1172.
- 12 C. Wang, X. Ma, Z. Fu, X. Hu, J. Fan and E. Liu, *J. Colloid Interface Sci.*, 2021, **592**, 66-76.
